# Supplementary material for: Thermal behavior of hydrochar from co-hydrothermal carbonization of swine manure and sawdust: effect of process water recirculation
Source: Royal Society of Chemistry journal article supplement (doi:10.1039/c9se00332k), 2019-01-01
Supplement: c9se00332k1.pdf [file c9se00332k1.pdf]

## Supplementary material

### Thermal behavior of the hydrochar from co-hydrothermal carbonization of swine manure and sawdust: Effect of process water recirculation

Qianqian Lang,<sup>ab</sup> Hainan Luo,<sup>c</sup> Yi Li,<sup>d</sup> Dong Li,<sup>ab</sup> Zhengang Liu,<sup>\*ab</sup> Tianxue Yang<sup>e</sup>

<sup>a</sup> *Research Center for Eco-Environmental Sciences, Chinese Academy of Sciences, Beijing 100085, China*

<sup>b</sup> *University of Chinese Academy of Sciences, Beijing 100049, China*

<sup>c</sup> *College of Chemical Engineering and Material Science, Zaozhuang University, Zaozhuang, Shandong Province 277160, China*

<sup>d</sup> *State Key Laboratory of Multiphase Complex Systems, Institute of Process Engineering (IPE), Chinese Academy of Sciences (CAS), Beijing 100190, PR China*

<sup>e</sup> *State Key Laboratory of Environmental Criteria and Risk Assessment, Chinese Research Academy of Environmental Sciences, Beijing 100012, China*

---

\* Corresponding author: Tel: +86 010-62915966, E-mail: [zgliu@rcees.ac.cn](mailto:zgliu@rcees.ac.cn),

Address: 18 Shuangqing Road, Beijing 100085, China

There are two figures and two tables in the supplementary material:

Fig. S1. The isoconversional plots of the hydrochars at various conversion rates by FWO

Fig. S2. The isoconversional plots of the hydrochars at various conversion rates by KAS

Fig. S1.

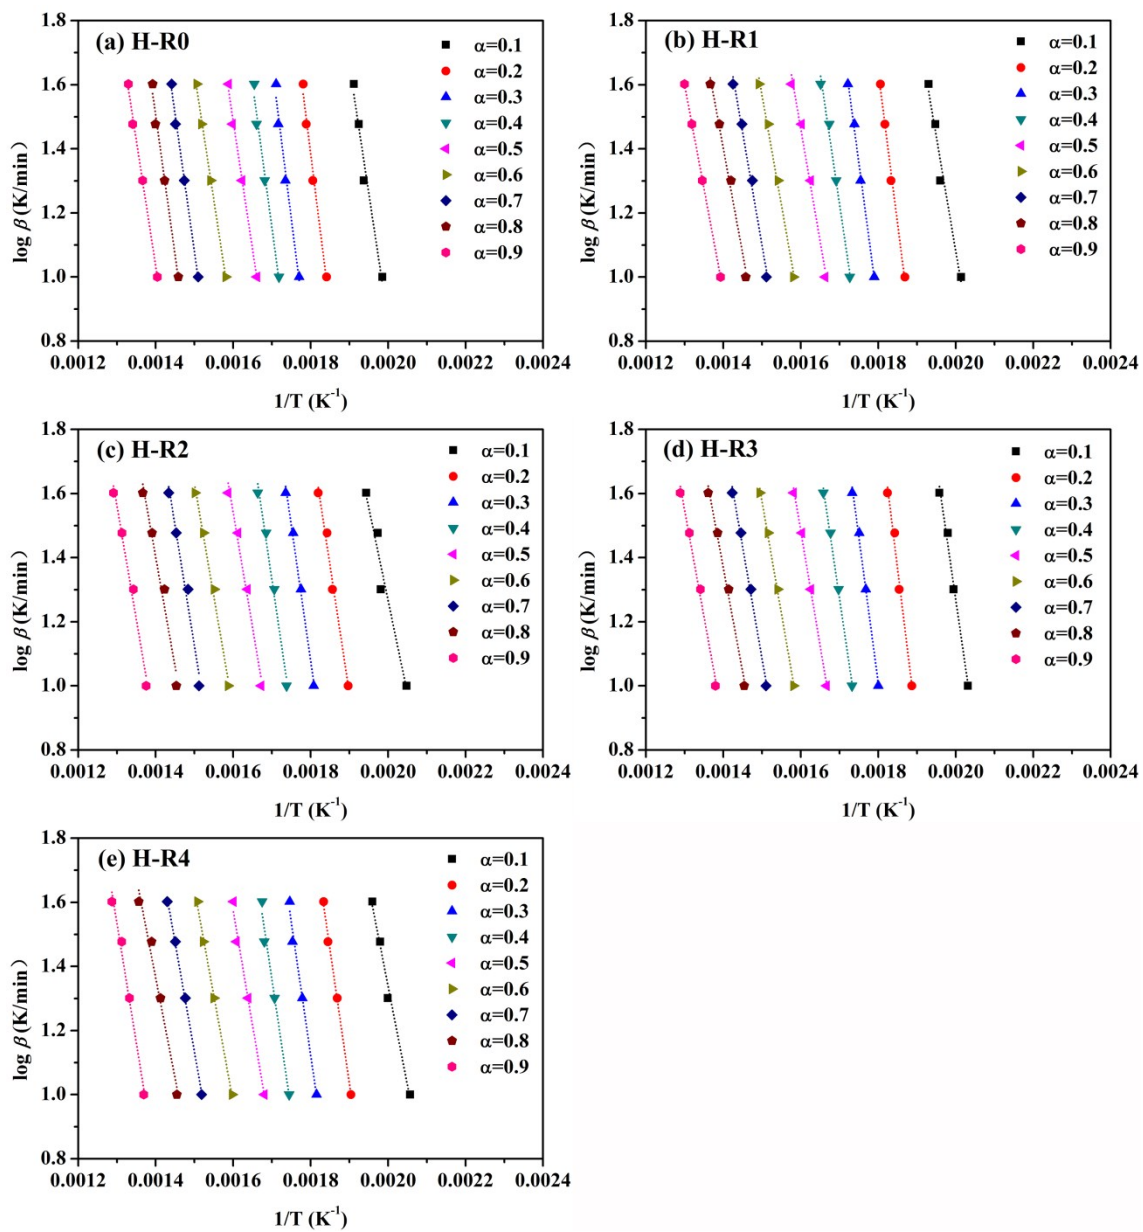

Fig. S2.

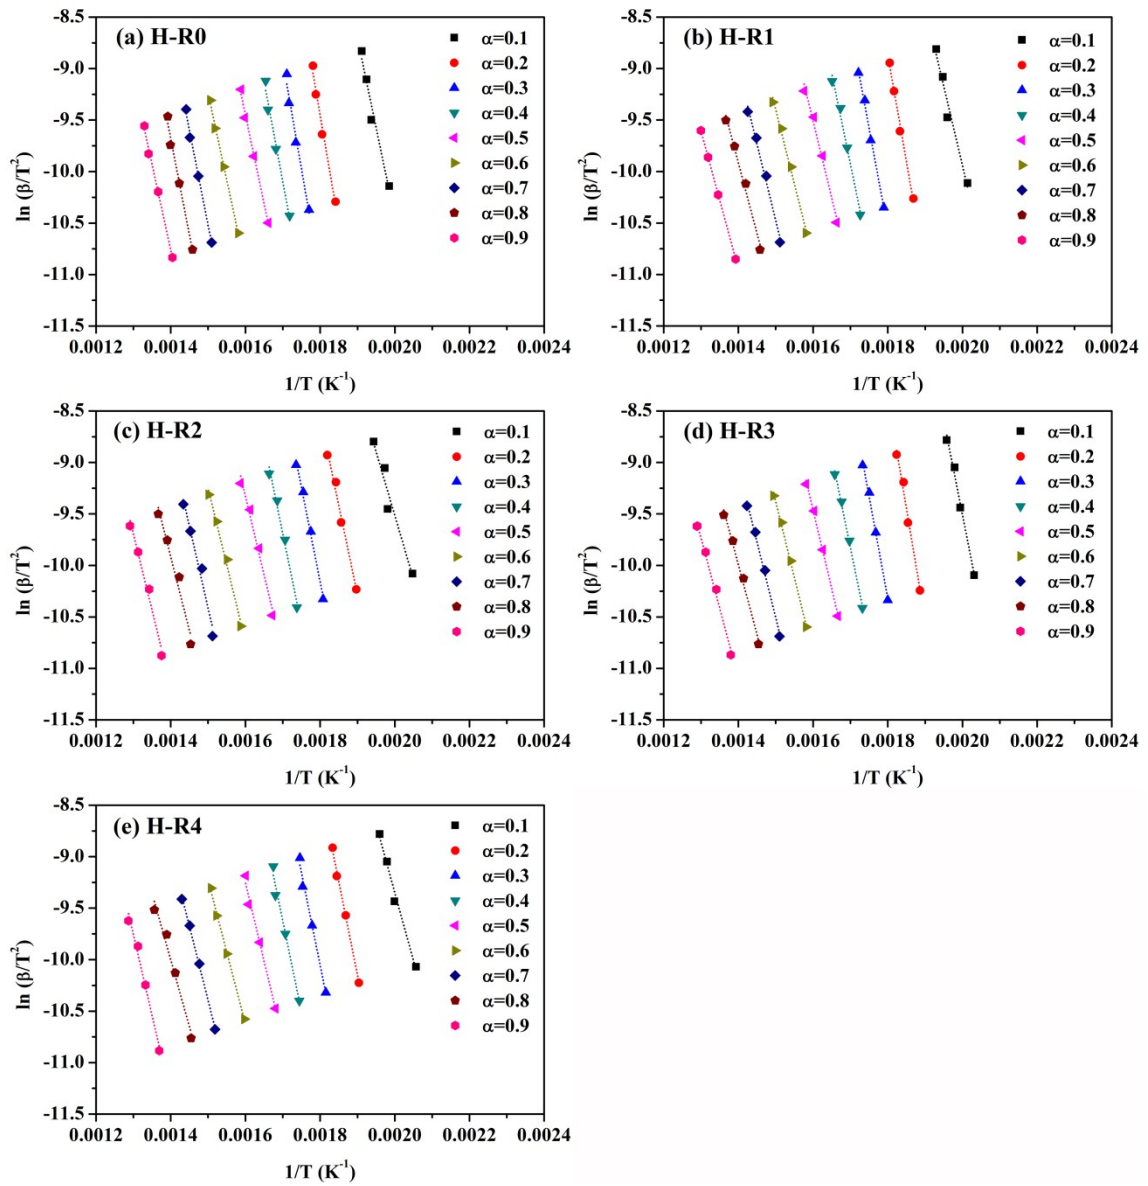

**Table S1** pH of the process water.

| Sample | W-R0      | W-R1      | W-R2      | W-R3      | W-R4      |
|--------|-----------|-----------|-----------|-----------|-----------|
| pH     | 4.50±0.05 | 4.49±0.05 | 4.55±0.03 | 4.61±0.03 | 4.58±0.01 |

**Table S2** Thermodynamic parameters of the hydrochars at heating rate of 20 °C/min

by FWO.

| Parameter            | $\alpha$ | Sample                  | □                       | □                       | □                       | □                       |
|----------------------|----------|-------------------------|-------------------------|-------------------------|-------------------------|-------------------------|
|                      |          | H-R0                    | H-R1                    | H-R2                    | H-R3                    | H-R4                    |
| A (s <sup>-1</sup> ) | 0.1      | 2.44 x 10 <sup>11</sup> | 9.77 x 10 <sup>9</sup>  | 6.80 x 10 <sup>7</sup>  | 9.13 x 10 <sup>8</sup>  | 2.01 x 10 <sup>8</sup>  |
|                      | 0.2      | 1.59 x 10 <sup>14</sup> | 9.67 x 10 <sup>13</sup> | 3.63 x 10 <sup>11</sup> | 1.69 x 10 <sup>13</sup> | 1.48 x 10 <sup>12</sup> |
|                      | 0.3      | 1.14 x 10 <sup>14</sup> | 1.69 x 10 <sup>13</sup> | 2.23 x 10 <sup>12</sup> | 3.46 x 10 <sup>11</sup> | 1.07 x 10 <sup>12</sup> |
|                      | 0.4      | 9.68 x 10 <sup>12</sup> | 6.19 x 10 <sup>11</sup> | 8.42 x 10 <sup>11</sup> | 2.53 x 10 <sup>11</sup> | 6.01 x 10 <sup>11</sup> |
|                      | 0.5      | 2.47 x 10 <sup>11</sup> | 6.88 x 10 <sup>9</sup>  | 1.45 x 10 <sup>10</sup> | 9.52 x 10 <sup>9</sup>  | 1.30 x 10 <sup>10</sup> |
|                      | 0.6      | 1.65 x 10 <sup>11</sup> | 3.34 x 10 <sup>9</sup>  | 8.78 x 10 <sup>9</sup>  | 4.61 x 10 <sup>9</sup>  | 1.60 x 10 <sup>9</sup>  |
|                      | 0.7      | 2.41 x 10 <sup>12</sup> | 6.90 x 10 <sup>9</sup>  | 5.47 x 10 <sup>10</sup> | 4.33 x 10 <sup>9</sup>  | 3.75 x 10 <sup>9</sup>  |
|                      | 0.8      | 3.67 x 10 <sup>12</sup> | 1.21 x 10 <sup>9</sup>  | 3.84 x 10 <sup>9</sup>  | 7.18 x 10 <sup>8</sup>  | 3.21 x 10 <sup>8</sup>  |
|                      | □        | 0.9                     | 1.29 x 10 <sup>11</sup> | 7.56 x 10 <sup>8</sup>  | 1.06 x 10 <sup>10</sup> | 1.27 x 10 <sup>9</sup>  |
| H (KJ/mol)           | 0.1      | 141.50                  | 125.21                  | 101.50                  | 115.23                  | 107.17                  |
|                      | 0.2      | 171.85                  | 168.01                  | 140.92                  | 161.20                  | 148.38                  |
|                      | 0.3      | 170.10                  | 159.61                  | 149.17                  | 142.60                  | 146.65                  |
|                      | 0.4      | 158.24                  | 143.92                  | 144.44                  | 140.93                  | 143.75                  |
|                      | 0.5      | 140.73                  | 122.71                  | 125.38                  | 125.28                  | 125.62                  |
|                      | 0.6      | 138.56                  | 119.06                  | 122.77                  | 121.59                  | 115.59                  |
|                      | 0.7      | 150.97                  | 122.19                  | 131.01                  | 121.05                  | 119.28                  |
|                      | 0.8      | 152.76                  | 113.88                  | 118.45                  | 112.39                  | 107.63                  |
|                      | 0.9      | 136.71                  | 111.37                  | 122.81                  | 114.73                  | 128.70                  |

|            |     |        |        |        |        |        |
|------------|-----|--------|--------|--------|--------|--------|
| G (KJ/mol) | 0.1 | 155.96 | 147.66 | 136.22 | 144.04 | 139.44 |
|            | 0.2 | 169.79 | 167.24 | 154.25 | 164.84 | 158.21 |
|            | 0.3 | 169.09 | 163.50 | 158.12 | 156.55 | 157.52 |
|            | 0.4 | 163.80 | 156.44 | 156.04 | 155.88 | 156.29 |
|            | 0.5 | 155.99 | 146.92 | 147.43 | 148.96 | 148.16 |
|            | 0.6 | 155.13 | 145.40 | 146.37 | 147.43 | 143.77 |
|            | 0.7 | 160.83 | 146.92 | 150.24 | 147.30 | 145.55 |
|            | 0.8 | 161.73 | 143.28 | 144.63 | 143.54 | 140.42 |
|            | 0.9 | 154.61 | 142.29 | 146.77 | 144.73 | 150.08 |
| S (J/mol)  | 0.1 | -24.65 | -38.60 | -60.07 | -49.16 | -55.52 |
|            | 0.2 | 3.50   | 1.33   | -23.06 | -6.21  | -16.91 |
|            | 0.3 | 1.73   | -6.69  | -15.47 | -23.80 | -18.70 |
|            | 0.4 | -9.46  | -21.52 | -20.06 | -25.52 | -21.57 |
|            | 0.5 | -26.01 | -41.64 | -38.16 | -40.40 | -38.79 |
|            | 0.6 | -28.25 | -45.29 | -40.84 | -44.09 | -48.48 |
|            | 0.7 | -16.80 | -42.53 | -33.27 | -44.80 | -45.20 |
|            | 0.8 | -15.28 | -50.54 | -45.30 | -53.14 | -56.41 |
| □          | 0.9 | -30.51 | -53.17 | -41.46 | -51.18 | -36.78 |
